# Supplementary material for: A Systematic Review and Meta-Analyses of Interventional Clinical Trial Studies for Gene Therapies for the Inherited Retinal Degenerations (IRDs)
Source: MDPI journal article supplement (doi:10.3390/biom11050760), 2021-05-19
Supplement: s1 [file s1]

## Supplementary Figures and Tables.

### Figures:

- **Figure S.1. (Supplemental).** (a) A simple hierarchy of evidence; (b) A list of 23 assays from the 6 selected studies; (c) Each of the 23 assays re-grouped and colour coded to clearly distinguish how the specific assays were to be used in the study
- **Figure S.2 (Supplemental).** Visual acuity logMAR, with a random effects model and summary statistic for dichotomous data showed

### Tables

- **Table S.1 (Supplemental).** PICOS results. The PICOS search terms, keywords, MeSH terms, search strings and Boolean operators were used and identified in Materials & Method (using Ovid Database), additionally defined Appendix A.1 to Appendix A.3.
- **Table S.2 (Supplemental).** All mean difference (MD) values for all visual acuity logMAR changes across all six (6) papers. All data was retrieved and analysed by two independent authors.
- **Table S.3 (Supplemental).** All ambulatory navigation / mobility across all six (6) papers. All data was retrieved and analysed by two independent authors.
- **Table S.4 (Supplemental).** MLMT (Russell et al. 2017) and FDA (BLA No. 125610).

**Figure S.1 (Supplemental)**

(a) A simple hierarchy of evidence for assessing outcome assays in LCA2 interventional studies, modelled in the hierarchy of evidence for assessing the quality of evidence in clinical research studies (Lang ES, 2007)[1]

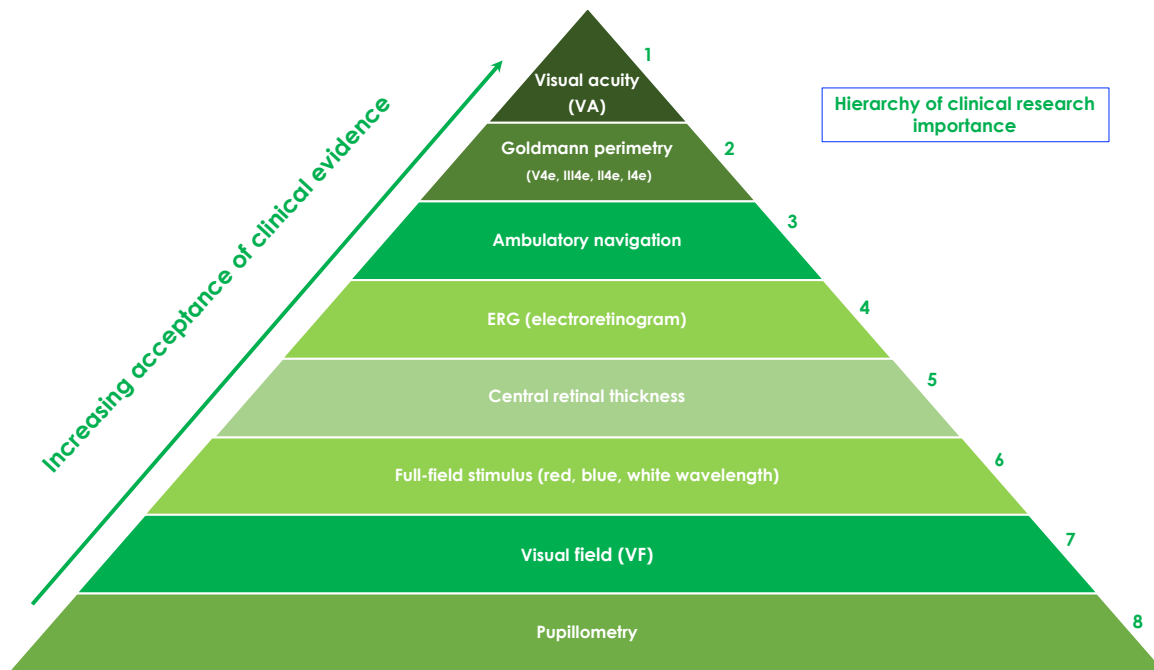

(b) Each of the 23 assays were ranked in the order of most prevalent assays chosen from the 6 selected studies.

| No. | Assays                                              | Most prevalent assays across the six studies |
|-----|-----------------------------------------------------|----------------------------------------------|
| 1   | Visual acuity (VA)                                  | 6                                            |
| 2   | Goldmann perimetry (V4e, III4e, II4e, I4e)          | 5                                            |
| 3   | Ambulatory navigation                               | 4                                            |
| 4   | ERG (electroretinogram)                             | 3                                            |
| 5   | Retinal thickness, OCT (CRT / fovea)                | 3                                            |
| 6   | FAF (fundus autofluorescence)                       | 2                                            |
| 7   | FST (blue wavelength) $\log_{10}(\text{cd.s/m}^2)$  | 2                                            |
| 8   | FST (red wavelength) $\log_{10}(\text{cd.s/m}^2)$   | 2                                            |
| 9   | Nystagmus testing                                   | 2                                            |
| 10  | Pupillary light reflex (PLR)                        | 2                                            |
| 11  | Pupillometry                                        | 2                                            |
| 12  | Dark-adapted perimetry                              | 2                                            |
| 13  | Colour vision                                       | 1                                            |
| 14  | Contrast sensitivity                                | 1                                            |
| 15  | fMRI                                                | 1                                            |
| 16  | FST (white wavelength) $\log_{10}(\text{cd.s/m}^2)$ | 1                                            |
| 17  | Fundus near infrared                                | 1                                            |
| 18  | Humphrey VF, fovea sensitivity                      | 1                                            |
| 19  | Humphrey VF, macula threshold                       | 1                                            |
| 20  | Microperimetry                                      | 1                                            |
| 21  | Spectral sensitivity                                | 1                                            |
| 22  | Vision questionnaire (QoL)                          | 1                                            |
| 23  | Visual field (VF) ( $V_{30}$ / $V_{TOT}$ )          | 1                                            |

(c) Each of the 23 assays were re-grouped and colour coded to clearly distinguish how the specific assays and were to be used in the study. For example, in Group 1, five (1 to 5) assays were capable to be used as a meta-analysis; while, in Group 2, seven (6 to 12) assays were assessed individually, but were not capable for generating a meta-analysis.

|         | Outcome assays for meta-analysis                           | Most prevalent assays | Study authors                                          |
|---------|------------------------------------------------------------|-----------------------|--------------------------------------------------------|
| Group 1 | 1 Visual acuity (BCVA) (logMAR)                            | 6                     | Bainbridge, Jacobson, Le Meur, Russell, Testa, Weleber |
|         | 2 Ambulatory navigation / mobility                         | 4                     | Bainbridge, Jacobson, Russell, Testa                   |
|         | 3 Retinal thickness, OCT (CRT / fovea)                     | 3                     | Bainbridge, Jacobson                                   |
|         | 4 FST (blue) log10(cd.s/m <sup>2</sup> )                   | 2                     | Jacobson, Russell                                      |
|         | 5 FST (red) log10(cd.s/m <sup>2</sup> )                    | 2                     | Jacobson, Russell                                      |
| Group 2 | 6 Goldmann perimetry (V4e, III4e, II4e, I4e)               | 5                     | Bainbridge, Le Meur, Russell, Testa, Weleber           |
|         | 7 ERG (electroretinogram)                                  | 3                     | Bainbridge, Testa, Weleber                             |
|         | 8 FAF (fundus autofluorescence)                            | 2                     | Bainbridge, Testa                                      |
|         | 9 Nystagmus testing                                        | 2                     | Le Meur, Testa                                         |
|         | 10 Pupillary light reflex (PLR)                            | 2                     | Le Meur, Testa                                         |
|         | 11 Pupillometry                                            | 2                     | Jacobson, Le Meur                                      |
|         | 12 Dark-adapted perimetry                                  | 2                     | Bainbridge, Testa                                      |
| Group 3 | 13 Colour vision                                           | 1                     | Bainbridge                                             |
|         | 14 Contrast sensitivity                                    | 1                     | Bainbridge                                             |
|         | 15 fMRI                                                    | 1                     | Le Meur                                                |
|         | 16 FST (white) log10(cd.s/m <sup>2</sup> )                 | 1                     | Russell                                                |
|         | 17 Fundus near infrared                                    | 1                     | Jacobson                                               |
|         | 18 Humphrey VF, fovea sensitivity                          | 1                     | Russell                                                |
|         | 19 Humphrey VF, macula threshold                           | 1                     | Russell                                                |
|         | 20 Microperimetry                                          | 1                     | Le Meur                                                |
|         | 21 Spectral sensitivity                                    | 1                     | Bainbridge                                             |
|         | 22 Vision questionnaire (QoL)                              | 1                     | Weleber                                                |
|         | 23 Visual field (VF) (V <sub>30</sub> / V <sub>TOT</sub> ) | 1                     | Weleber                                                |

**Figure S.2 (Supplemental) Visual acuity (dichotomous analysis)**

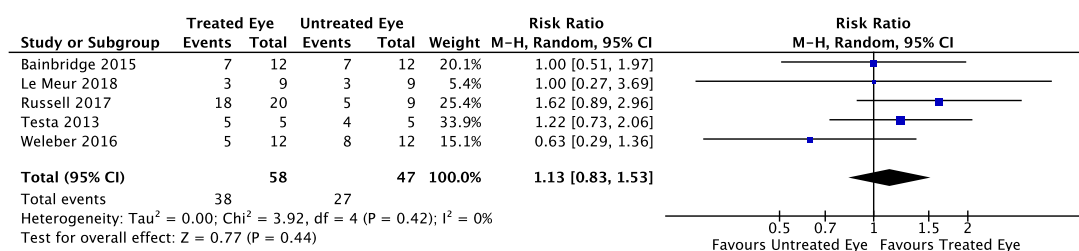

**Figure S.2 (Supplemental).** Visual acuity logMAR, with a random effects model and summary statistic for dichotomous data showed that the line of no effect (RR of 1.13 (95% CI 0.83, 1.53)) indicated an improvement with treated eyes compared with untreated eyes and this supports the previous continuous data in the marginal difference of -0.06 logMAR (main paper Figure 2). The dichotomous data indicated a small improvement that did not reached clinical significance.

**Table S.1(Supplemental).** PICOS results. The PICOS search terms, keywords, MeSH terms, search strings and Boolean operators were used and identified in Materials & Method (using Ovid Database), additionally defined within Appendix A.1 to Appendix A.3.

| PICOS                | Lead search terms<br>(Ovid Database)  | Number<br>of search<br>terms | MEDLINE<br>Database<br>Results | EMBASE<br>Database<br>Results | Cochrane<br>Database<br>Results | Additional<br>resources |
|----------------------|---------------------------------------|------------------------------|--------------------------------|-------------------------------|---------------------------------|-------------------------|
| Population           | Retinitis pigmentosa, and other terms | 8                            | 85,822                         | 867,550                       | 7                               | -                       |
| Intervention         | Gene therapies, and other terms       | 8                            | 80,450                         | 138,881                       | 0                               | -                       |
| Comparison           | Comparison (no terms)                 | 0                            | 0                              | 0                             | 6                               | -                       |
| Outcomes             | Visual acuity, and other terms        | 15                           | 267,300                        | 520,911                       | 8                               | 2                       |
| Study design         | Clinical trial, and other terms       | 5                            | 702,125                        | 792,290                       | 8                               | -                       |
|                      | Boolean results                       | <b>36</b>                    | <b>58</b>                      | <b>55</b>                     | <b>0</b>                        | <b>2</b>                |
| <b>Total results</b> |                                       |                              | <b>115</b>                     |                               |                                 |                         |

**Table S.2 (Supplemental).** All mean difference (MD) values for all visual acuity logMAR changes across all six (6) papers. All data was retrieved and analysed by two independent authors.

| <b>LCA2-RPE65 gene therapy for mean differences of visual acuity (VA) outcomes (logMAR)</b> |                           |           |                           |           |                                 |                                   |
|---------------------------------------------------------------------------------------------|---------------------------|-----------|---------------------------|-----------|---------------------------------|-----------------------------------|
| <i>Author / Year</i>                                                                        | <i>Treated eye</i>        |           | <i>Control eye</i>        |           | <i>Mean Difference (logMAR)</i> | <i>VA Improves / Deteriorates</i> |
|                                                                                             | <i>Treated eye (n=12)</i> |           | <i>Control eye (n=12)</i> |           |                                 |                                   |
| <b>Bainbridge 2015 (1 year)</b>                                                             | <b>Mean</b>               | <b>SD</b> | <b>Mean</b>               | <b>SD</b> |                                 |                                   |
| Baseline                                                                                    | 0.776                     | 0.316     | 0.703                     | 0.335     |                                 |                                   |
| 1 Year                                                                                      | 0.768                     | 0.314     | 0.640                     | 0.361     |                                 |                                   |
| <b>Change of logMAR</b>                                                                     | <b>-0.008</b>             | [0.193]   | <b>-0.063</b>             | [0.121]   | <b>0.055</b>                    | VA deteriorates                   |
|                                                                                             | <i>Treated eye (n=12)</i> |           | <i>Control eye (n=12)</i> |           |                                 |                                   |
| <b>Bainbridge 2015 (3 year)</b>                                                             | <b>Mean</b>               | <b>SD</b> | <b>Mean</b>               | <b>SD</b> |                                 |                                   |
| Baseline                                                                                    | 0.776                     | 0.316     | 0.703                     | 0.335     |                                 |                                   |
| 3 Year                                                                                      | 0.848                     | 0.386     | 0.690                     | 0.395     |                                 |                                   |
| <b>Change of logMAR</b>                                                                     | <b>0.072</b>              | 0.263     | <b>-0.013</b>             | 0.139     | <b>0.084</b>                    | VA deteriorates                   |
|                                                                                             | <i>Treated eye (n=15)</i> |           | <i>Control eye (n=15)</i> |           |                                 |                                   |
| <b>Jacobson 2012 (3 year)</b>                                                               | <b>Mean</b>               | <b>SD</b> | <b>Mean</b>               | <b>SD</b> |                                 |                                   |
| Baseline                                                                                    | 1.090                     | 0.426     | 0.960                     | 0.503     |                                 |                                   |
| 3 Year                                                                                      | 0.970                     | 0.426     | 0.910                     | 0.503     |                                 |                                   |
| <b>Change of logMAR</b>                                                                     | <b>-0.120</b>             | 0.194     | <b>-0.050</b>             | 0.077     | <b>-0.070</b>                   | VA improves                       |
|                                                                                             | <i>Treated eye (n=9)</i>  |           | <i>Control eye (n=9)</i>  |           |                                 |                                   |
| <b>Le Meur 2018 (1 year)</b>                                                                | <b>Mean</b>               | <b>SD</b> | <b>Mean</b>               | <b>SD</b> |                                 |                                   |
| Baseline                                                                                    | 1.070                     | 0.458     | 0.878                     | 0.413     |                                 |                                   |
| 1 Year                                                                                      | 1.020                     | 0.389     | 0.858                     | 0.358     |                                 |                                   |
| <b>Change of logMAR</b>                                                                     | <b>-0.050</b>             | 0.187     | <b>-0.020</b>             | 0.122     | <b>-0.030</b>                   | VA improves                       |
|                                                                                             | <i>Treated eye (n=9)</i>  |           | <i>Control eye (n=9)</i>  |           |                                 |                                   |
| <b>Le Meur 2018 (2-3 year)</b>                                                              | <b>Mean</b>               | <b>SD</b> | <b>Mean</b>               | <b>SD</b> |                                 |                                   |
| Baseline                                                                                    | 1.070                     | 0.458     | 0.878                     | 0.413     |                                 |                                   |
| 2-3 Year                                                                                    | 1.010                     | 0.451     | 0.910                     | 0.480     |                                 |                                   |
| <b>Change of logMAR</b>                                                                     | <b>-0.057</b>             | 0.152     | <b>0.0325</b>             | 0.141     | <b>-0.089</b>                   | VA improves                       |
|                                                                                             | <i>Treated (n=20)</i>     |           | <i>Control (n=9)</i>      |           |                                 |                                   |
| <b>Russell 2017</b>                                                                         | <b>Mean</b>               | <b>SD</b> | <b>Mean</b>               | <b>SD</b> |                                 |                                   |
| Baseline                                                                                    | 1.137                     | 0.369     | 0.987                     | 0.306     |                                 |                                   |
| 1 Year                                                                                      | 0.975                     | 0.542     | 0.954                     | 0.333     |                                 |                                   |
| <b>Change of logMAR</b>                                                                     | <b>-0.163</b>             | 0.336     | <b>-0.031</b>             | 0.097     | <b>-0.131</b>                   | VA improves                       |
|                                                                                             | <i>Treated eye (n=5)</i>  |           | <i>Control eye (n=5)</i>  |           |                                 |                                   |
| <b>Testa 2013 (1 year)</b>                                                                  | <b>Mean</b>               | <b>SD</b> | <b>Mean</b>               | <b>SD</b> |                                 |                                   |
| Baseline                                                                                    | 1.470                     | 0.316     | 1.136                     | 0.335     |                                 |                                   |
| 1 Year                                                                                      | 0.984                     | 0.502     | 0.872                     | 0.464     |                                 |                                   |
| <b>Change of logMAR</b>                                                                     | <b>-0.486</b>             | 0.040     | <b>-0.264</b>             | 0.130     | <b>-0.222</b>                   | VA improves                       |
|                                                                                             | <i>Treated eye (n=5)</i>  |           | <i>Control eye (n=5)</i>  |           |                                 |                                   |
| <b>Testa 2013 (3 year)</b>                                                                  | <b>Mean</b>               | <b>SD</b> | <b>Mean</b>               | <b>SD</b> |                                 |                                   |
| Baseline                                                                                    | 1.470                     | 0.316     | 1.136                     | 0.335     |                                 |                                   |
| 3 Year                                                                                      | 1.0200                    | 0.471     | 0.9680                    | 0.551     |                                 |                                   |
| <b>Change of logMAR</b>                                                                     | <b>-0.450</b>             | 0.094     | <b>-0.168</b>             | 0.238     | <b>-0.282</b>                   | VA improves                       |
|                                                                                             | <i>Treated eye (n=12)</i> |           | <i>Control eye (n=12)</i> |           |                                 |                                   |
| <b>Weleber 2016 (1 year)</b>                                                                | <b>Mean</b>               | <b>SD</b> | <b>Mean</b>               | <b>SD</b> |                                 |                                   |
| Baseline                                                                                    | 1.220                     | 0.474     | 1.131                     | 0.514     |                                 |                                   |
| 1 Year                                                                                      | 1.195                     | 0.558     | 1.085                     | 0.541     |                                 |                                   |
| <b>Change of logMAR</b>                                                                     | <b>-0.025</b>             | 0.133     | <b>-0.046</b>             | 0.073     | <b>0.021</b>                    | VA deteriorates                   |

**Table S.3 (Supplemental).** All ambulatory navigation / mobility across all six (6) papers. All data was retrieved and analysed by two independent authors. Ratios may differ from RevMan analysis, partially computed by weightings.

| Sub-group A: Ambulatory navigation / mobility, lux 4 only (common to 4 studies) |              |       |                               |                |       |                               |       |
|---------------------------------------------------------------------------------|--------------|-------|-------------------------------|----------------|-------|-------------------------------|-------|
|                                                                                 | Treated eyes |       |                               | Untreated eyes |       |                               | Ratio |
|                                                                                 | Events       | Total | Percentage of positive events | Events         | Total | Percentage of positive events |       |
| Bainbridge 2015                                                                 | 2            | 11    |                               | 0              | 11    |                               | 5.00  |
| Jacobson 2012                                                                   | 4            | 6     |                               | 3              | 6     |                               | 1.33  |
| Russell 2017                                                                    | 3            | 20    |                               | 2              | 9     |                               | 0.68  |
| Testa 2013                                                                      | 5            | 5     |                               | 5              | 5     |                               | 1.00  |
| Sum of Events, Total                                                            | 14           | 42    | 33.3%                         | 10             | 31    | 32.3%                         | 2.00  |

  

| Sub-group B: Ambulatory navigation / mobility, low ambient light (lux 0.2, 0.6, 1, 2, 4) |              |       |                               |                |       |                               |       |
|------------------------------------------------------------------------------------------|--------------|-------|-------------------------------|----------------|-------|-------------------------------|-------|
|                                                                                          | Treated eyes |       |                               | Untreated eyes |       |                               | Ratio |
|                                                                                          | Events       | Total | Percentage of positive events | Events         | Total | Percentage of positive events |       |
| Bainbridge 2015                                                                          | 2            | 11    |                               | 0              | 11    |                               | 5.00  |
| Jacobson 2012                                                                            | 20           | 24    |                               | 17             | 24    |                               | 1.18  |
| Russell 2017                                                                             | 16           | 20    |                               | 2              | 9     |                               | 3.60  |
| Testa 2013                                                                               | 5            | 5     |                               | 5              | 5     |                               | 1.00  |
| Sum of Events, Total                                                                     | 43           | 60    | 71.7%                         | 24             | 49    | 49.0%                         | 2.69  |

  

| Sub-group C: Ambulatory navigation / mobility, high ambient light (lux 10, 15, 50, 100) |              |       |                               |                |       |                               |       |
|-----------------------------------------------------------------------------------------|--------------|-------|-------------------------------|----------------|-------|-------------------------------|-------|
|                                                                                         | Treated eyes |       |                               | Untreated eyes |       |                               | Ratio |
|                                                                                         | Events       | Total | Percentage of positive events | Events         | Total | Percentage of positive events |       |
| Bainbridge 2015                                                                         | 0            | 12    |                               | 2              | 12    |                               | 0.20  |
| Jacobson 2012                                                                           | 0            | 6     |                               | 2              | 6     |                               | 0.20  |
| Russell 2017                                                                            | 3            | 20    |                               | 2              | 9     |                               | 0.68  |
| Sum of Events, Total                                                                    | 3            | 38    | 7.9%                          | 6              | 27    | 22.2%                         | 0.36  |

  

| Sub-group D: Ambulatory navigation / mobility, all ambient light (lux 0.2, 0.6, 1, 2, 4, 10, 15, 50, 100) |              |       |                               |                |       |                               |       |
|-----------------------------------------------------------------------------------------------------------|--------------|-------|-------------------------------|----------------|-------|-------------------------------|-------|
|                                                                                                           | Treated eyes |       |                               | Untreated eyes |       |                               | Ratio |
|                                                                                                           | Events       | Total | Percentage of positive events | Events         | Total | Percentage of positive events |       |
| Bainbridge 2015                                                                                           | 2            | 11    |                               | 2              | 12    |                               | 1.09  |
| Jacobson 2012                                                                                             | 20           | 30    |                               | 19             | 30    |                               | 1.05  |
| Russell 2017                                                                                              | 19           | 20    |                               | 4              | 9     |                               | 2.14  |
| Testa 2013                                                                                                | 5            | 5     |                               | 5              | 5     |                               | 1.00  |
| Sum of Events, Total                                                                                      | 46           | 66    | 69.7%                         | 30             | 56    | 53.6%                         | 1.32  |



**Table S.4 (Supplemental).** MLMT (Russell et al. 2017) and FDA (BLA No. 125610).

Table S.4 (a). Data has been derived from the MLMT assay from Russell et al., (2017), Supplementary Appendix[2]. This study presents a “Baseline Passing Level (lux level)” to compare against a “1 Year Passing Level (lux level)”, providing a “Change score”. The change score requires a separate table (Chung et al., (2018) [6]) to identify data to convert a logarithmic scale to an ordinal scale and then compute a mean difference [MD] of 1.6, 95% CI 0.72-2.41,  $p = 0.0013$ .

| Derived from Russell 2017, Supplementary appendix, pg. 11-13, Table S3. Individual Subject-Level Data (Primary Endpoint, MLMT) |            |                      |        |                                    |                     |                                  |                           |              |
|--------------------------------------------------------------------------------------------------------------------------------|------------|----------------------|--------|------------------------------------|---------------------|----------------------------------|---------------------------|--------------|
| Number                                                                                                                         | Subject ID | Age at randomization | Gender | Baseline Passing Level (lux level) | Baseline MLMT score | 1 Year Passing Level (lux level) | 1 yr timepoint MLMT score | Change Score |
| Treatment (n=20)                                                                                                               |            |                      |        |                                    |                     |                                  |                           |              |
| 1                                                                                                                              | CH-22      | 20                   | F      | 50                                 | 3                   | 1                                | 6                         | 3            |
| 2                                                                                                                              | IA-23      | 11                   | F      | 10                                 | 4                   | 1                                | 6                         | 2            |
| 3                                                                                                                              | CH-25      | 33                   | F      | >400                               | -1                  | >400                             | -1                        | 0            |
| 4                                                                                                                              | IA-26      | 4                    | F      | 125                                | 2                   | 1                                | 6                         | 4            |
| 5                                                                                                                              | IA-27      | 11                   | F      | 50                                 | 3                   | 1                                | 6                         | 3            |
| 6                                                                                                                              | CH-30      | 6                    | M      | 4                                  | 5                   | 1                                | 6                         | 1            |
| 7                                                                                                                              | CH-31      | 13                   | F      | 50                                 | 3                   | 1                                | 6                         | 3            |
| 8                                                                                                                              | IA-32      | 5                    | F      | 10                                 | 4                   | 1                                | 6                         | 2            |
| 9                                                                                                                              | IA-33      | 6                    | F      | 4                                  | 5                   | 1                                | 6                         | 1            |
| 10                                                                                                                             | CH-34      | 13                   | M      | 10                                 | 4                   | 1                                | 6                         | 2            |
| 11                                                                                                                             | IA-35      | 34                   | M      | 50                                 | 3                   | 10                               | 4                         | 1            |
| 12                                                                                                                             | IA-38      | 16                   | M      | 50                                 | 3                   | 4                                | 5                         | 2            |
| 13                                                                                                                             | CH-41      | 6                    | F      | 50                                 | 3                   | 1                                | 6                         | 3            |
| 14                                                                                                                             | CH-42      | 6                    | F      | 10                                 | 4                   | 4                                | 5                         | 1            |
| 15                                                                                                                             | CH-44      | 5                    | M      | 10                                 | 4                   | 4                                | 5                         | 1            |
| 16                                                                                                                             | CH-45      | 11                   | M      | 50                                 | 3                   | 1                                | 6                         | 3            |
| 17                                                                                                                             | CH-47      | 8                    | M      | 4                                  | 5                   | 1                                | 6                         | 1            |
| 18                                                                                                                             | IA-49      | 34                   | F      | 125                                | 2                   | 50                               | 3                         | 1            |
| 19                                                                                                                             | IA-50      | 44                   | F      | 125                                | 2                   | 10                               | 4                         | 2            |
| 20                                                                                                                             | IA-52      | 5                    | M      | 4                                  | 5                   | 1                                | 6                         | 1            |
|                                                                                                                                |            |                      |        |                                    | 3.3                 |                                  | 5.2                       | 1.85         |
| Control n=9                                                                                                                    |            |                      |        |                                    |                     |                                  |                           |              |
| 1                                                                                                                              | CH-16      | 10                   | F      | 50                                 | 3                   | 10                               | 4                         | 1            |
| 2                                                                                                                              | CH-17      | 19                   | F      | 125                                | 2                   | 250                              | 1                         | -1           |
| 3                                                                                                                              | CH-18      | 9                    | F      | 10                                 | 4                   | 4                                | 5                         | 1            |
| 4                                                                                                                              | CH-19      | 7                    | M      | 50                                 | 3                   | 125                              | 2                         | -1           |
| 5                                                                                                                              | IA-29      | 28                   | F      | 50                                 | 3                   | 50                               | 3                         | 0            |
| 6                                                                                                                              | CH-36      | 9                    | F      | 10                                 | 4                   | 50                               | 3                         | -1           |
| 7                                                                                                                              | CH-37      | 24                   | M      | 4                                  | 5                   | 4                                | 5                         | 0            |
| 8                                                                                                                              | CH-43      | 4                    | M      | 50                                 | 3                   | 4                                | 5                         | 2            |
| 9                                                                                                                              | CH-53      | 18                   | F      | 50                                 | 3                   | 10                               | 4                         | 1            |
|                                                                                                                                |            |                      |        |                                    | 3.3                 |                                  | 3.6                       | 0.22         |
| Key - Scoring code for multi-lumiance mobility test change score (Chung et al 2018).                                           |            |                      |        |                                    |                     |                                  |                           |              |
| Lux                                                                                                                            | 1          | 4                    | 10     | 50                                 | 100 / 150           | 200 / 250                        | 400                       | >400         |
| Score                                                                                                                          | 6          | 5                    | 4      | 3                                  | 2                   | 1                                | 0                         | -1           |

The MLTM assay methodology was set out in Russell *et al.*[2], more comprehensively described by Chung *et al.*[6]. The MLMT score was calculated by taking into account several components – light intensity level (lux), accuracy, speed, time, obstacles, re-directions, collisions, faults, time penalties and a “final passing” score – however, these individual

components were not fully described in the Russell *et al.* paper [2], whereby the specific measurements were not available within the study, and not available within the FDA Biologics License Application. The Chung *et al.*[6], used the MLMT assay to describe a pool of 29 normal sighted subjects and 31 visually impaired IRD patient phenotypes, including twenty (20) subjects diagnosed with LCA, five (5) with choroideremia, four (4) with RP and one (1) each with Stargardt disease and Usher syndrome. Alternative models for mobility in other retinal degenerative disorders may be available in the literature [5, 7–11].

Independent criticism of the scoring system was ordinal (ranging from -1 to 6), while the light intensities (lux) that determined the scoring system was used in logarithmic scale, such that a two-point change in the ordinal scale may have a different interpretation depending on the baseline score (Darrow, 2019[4], (*Drug Discovery Today*, Volume 4, Number 4, April 2019).

**Table S.4 (b).** Further data has been derived from the MLMT results reported from the FDA (Zhu, Y-Y., 2017[12], BLA Clinical Review Memorandum No. 125610, *Figure 10 – MLMT Score Change for Individual Subjects Using Both Eyes (ITT)*, pp 51)). This study presents that some of these patients have successfully navigated the MLMT result however, in the context of a small sample size population, 11 treated patients met the endpoint, and 9 treated patients missed the endpoint (55% vs 45%), in a single duration period (1-year timepoint). Any follow-up study for the same patients under the 2-year or 3-year timepoint, or for any phase IV data, may provide an independent valuable insight for the LCA field.

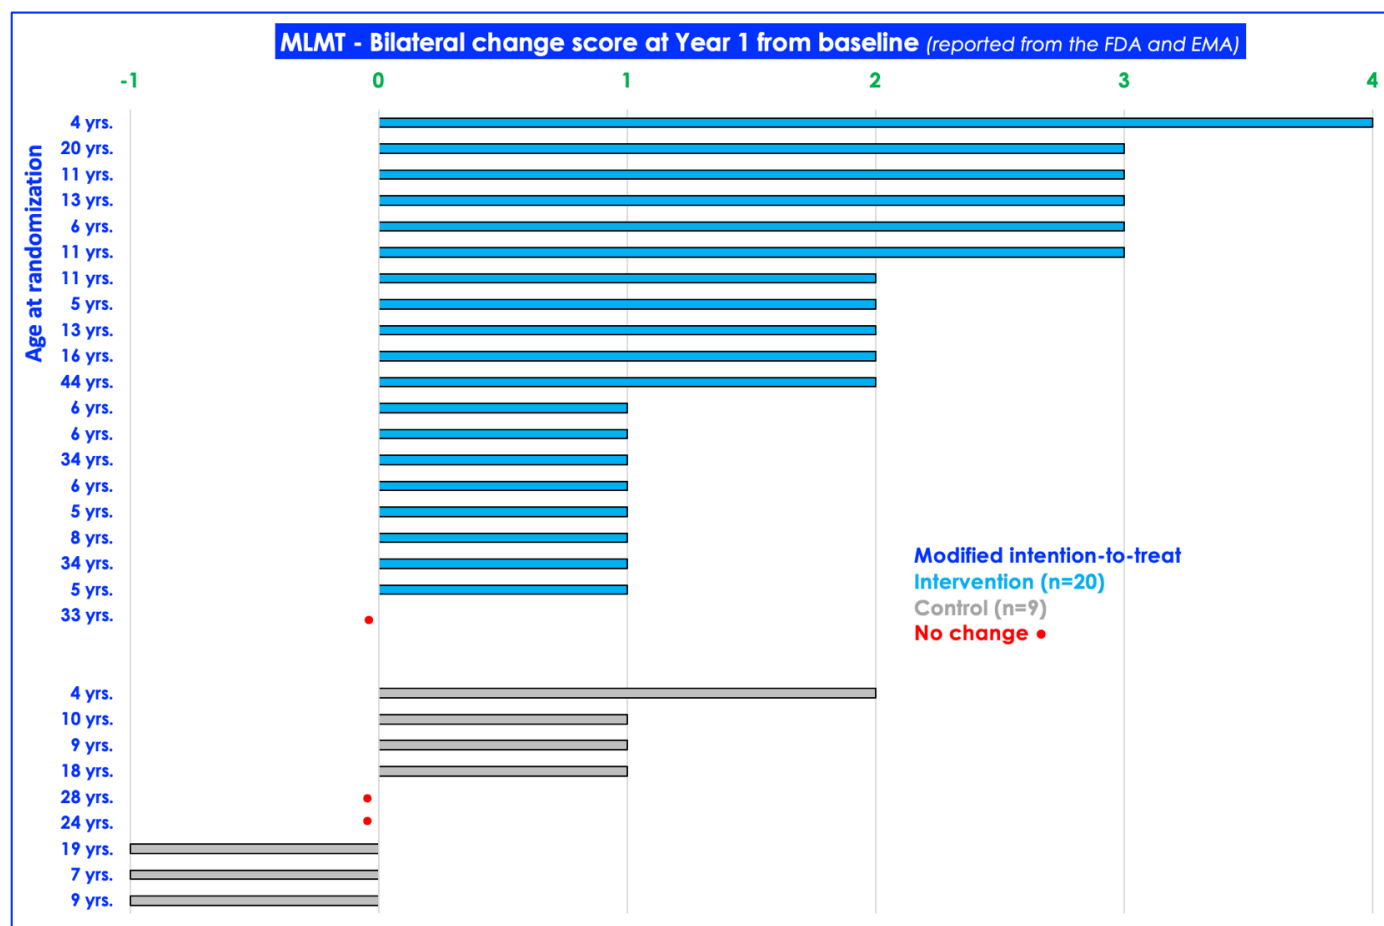

In summary, the overall result of the MLMT assay showed a benefit of 11 of the 20 treated patients (55%) met a clinically meaningful outcome, compared to 1 of 9 untreated patients (11%).

## References

1. Lang, E.S.; Wyer, P.C.; Haynes, R.B. Knowledge Translation: Closing the Evidence-to-Practice Gap. *Ann. Emerg. Med.* **2007**, *49*, 355–363, doi:10.1016/j.annemergmed.2006.08.022.
2. Russell, S.; Bennett, J.; Wellman, J.A.; Chung, D.C.; Yu, Z.-F.; Tillman, A.; Wittes, J.; Pappas, J.; Elci, O.; McCague, S.; et al. Efficacy and safety of voretigene neparvovec (AAV2-hRPE65v2) in patients with RPE65-mediated inherited retinal dystrophy: A randomised, controlled, open-label, phase 3 trial. *Lancet* **2017**, *390*, 849–860, doi:10.1016/s0140-6736(17)31868-8.
3. Weleber, R.G.; Pennesi, M.E.; Wilson, D.J.; Kaushal, S.; Erker, L.R.; Jensen, L.; McBride, M.T.; Flotte, T.R.; Humphries, M.; Calcedo, R.; et al. Results at 2 Years after Gene Therapy for RPE65-Deficient Leber Congenital Amaurosis and Severe Early-Childhood-Onset Retinal Dystrophy. *Ophthalmology* **2016**, *123*, 1606–1620, doi:10.1016/j.ophtha.2016.03.003.A
4. Darrow, J.J. Luxturna: FDA documents reveal the value of a costly gene therapy. *Drug Discov. Today* **2019**, *24*, 949–954, doi:10.1016/j.drudis.2019.01.019.

5. Ayton, L.N.; Rizzo, J.F.; Bailey, I.L.; Colenbrander, A.; Dagnelie, G.; Geruschat, D.R.; Hessburg, P.C.; McCarthy, C.D.; Petoe, M.A.; Rubin, G.S.; et al. Harmonization of Outcomes and Vision Endpoints in Vision Restoration Trials: Recommendations from the International HOVER Taskforce. *Transl. Vis. Sci. Technol.* **2020**, *9*, 25–89, doi:10.1167/tvst.9.8.25.
6. Chung DC, McCague S, Yu ZF, Thill S, DiStefano-Pappas J, Bennett J, Cross D, Marshall K, Wellman J, High KA. Novel mobility test to assess functional vision in patients with inherited retinal dystrophies. *Clin Exp Ophthalmol.* 2018 Apr;46(3):247-259. doi: 10.1111/ceo.13022. Epub 2017 Aug 31. PMID: 28697537; PMCID: PMC5764825.
7. Warrian, K.J.; Katz, L.J.; Myers, J.S.; Moster, M.R.; Pro, M.J.; Wizov, S.S.; Spaeth, G.L. A comparison of methods used to evaluate mobility performance in the visually impaired. *Br. J. Ophthalmol.* **2014**, *99*, 113–118, doi:10.1136/bjophthalmol-2014-305324.
8. Leat, S.J.; Lovie-Kitchin, J.E. Measuring mobility performance: Experience gained in designing a mobility course. *Clin. Exp. Optom.* **2006**, *89*, 215–228, doi:10.1111/j.1444-0938.2006.00050.x.
9. Haymes, S.; Guest, D.; Heyes, A.; Johnston, A. Comparison of Functional Mobility Performance with Clinical Vision Measures in Simulated Retinitis Pigmentosa. *Optom. Vis. Sci.* **1994**, *71*, 442–453, doi:10.1097/00006324-199407000-00004.
10. Geruschat, D.R.; Turano, K.A.; Stahl, J.W. Traditional Measures of Mobility Performance and Retinitis Pigmentosa. *Optom. Vis. Sci.* **1998**, *75*, 525–537, doi:10.1097/00006324-199807000-00022.
11. Hartong, D.T.; Jorritsma, F.F.; Neve, J.J.; Melis-Dankers, B.J.M.; Kooijman, A.C. Improved mobility and independence of night-blind people using night-vision goggles. *Investig. Ophthalmol. Vis. Sci.* **2004**, *45*, 1725–1731, doi:10.1167/iovs.03-1061.
12. Zhu, Y.-Y. BLA Clinical Review Memorandum-No. 125610 (FDA). 2017. Available online: <https://www.fda.gov/files/vaccines%2Cblood%26biologics/published/Clinical-Review--December-16--2017---LUXTURNA.pdf> (accessed on 8 March 2021).
